# Supplementary material
Source: HighWire-hosted journal article supplement (https://mentalhealth.bmj.com/content/24/2/49)
Supplement: inline-supplementary-material-3 [file inline-supplementary-material-3.pdf]

**Table 5** Cluster structure for the 17 items of Maastricht Questionnaire according to the oblique principal component cluster analysis.

|                                                                      | R <sup>2</sup> own cluster | R <sup>2</sup> closest cluster | 1-R <sup>2</sup> ratio |
|----------------------------------------------------------------------|----------------------------|--------------------------------|------------------------|
| <b>Cluster 1</b>                                                     |                            |                                |                        |
| MQ1: Do you often feel tired?                                        | 0.431                      | 0.136                          | 0.658                  |
| MQ2: Do you feel altogether weak?                                    | 0.461                      | 0.213                          | 0.685                  |
| MQ3: Do you feel you have not accomplished much recently?            | 0.528                      | 0.245                          | 0.625                  |
| MQ12: Do you sometimes feel your body is like a battery running out? | 0.510                      | 0.237                          | 0.642                  |
| MQ14: Are you feeling 'not worth a scrap' at present?                | 0.567                      | 0.322                          | 0.639                  |
| MQ17: Do you ever wake up with a feeling of exhaustion?              | 0.416                      | 0.181                          | 0.713                  |
| <b>Cluster 2</b>                                                     |                            |                                |                        |
| MQ4: Do you, at the moment feel that you do not have what it takes?  | 0.435                      | 0.242                          | 0.745                  |
| MQ5: Do you believe you have come to a dead end?                     | 0.320                      | 0.142                          | 0.793                  |
| MQ6: Do you lately feel listless?                                    | 0.480                      | 0.303                          | 0.746                  |
| MQ7: Do you feel dejected?                                           | 0.573                      | 0.225                          | 0.552                  |
| MQ8: Do you lately have difficulties in concentrating?               | 0.299                      | 0.185                          | 0.860                  |
| MQ9: Do little things irritate you more than they used to?           | 0.415                      | 0.198                          | 0.729                  |
| MQ10: Do you feel that you want to give up?                          | 0.452                      | 0.131                          | 0.630                  |
| MQ11: I feel fine(reversed).                                         | 0.373                      | 0.237                          | 0.822                  |
| MQ13: Do you sometimes wish you were dead?                           | 0.263                      | 0.068                          | 0.791                  |
| MQ15: Do you have feelings of hopelessness recently?                 | 0.529                      | 0.203                          | 0.591                  |
| MQ16: Do you sometimes just feel like crying?                        | 0.418                      | 0.176                          | 0.706                  |

Maastricht Questionnaire (MQ).
